# Supplementary material for: Multifunctional Epoxy/Nanocomposites Based on Natural Moroccan Clays with High Antimicrobial Activity: Morphological, Thermal and Mechanical Properties
Source: Hindawi journal article supplement (doi:10.1155/2019/2810901), 2019-11-22
Supplement: f1 [file 2810901.f1.docx]

**Supplementary Material**

**Multifunctional Epoxy/nanocomposites based on natural Moroccan Clays with high antimicrobial activity: morphological, thermal and mechanical properties**

**M. Monsif1,2, A. Zerouale1, N. Idrissi Kandri2, R. Bertani3,*, A. Bartolozzi3, B.M. Bresolin3, F. Zorzi4, F. Tateo5, M. Zappalorto6, M. Quaresimin6, P. Sgarbossa3**

*1Laboratory of Chemistry of Condensed Matter, Faculty of Sciences and Technology, University Sidi Mohamed Ben Abdellah,Road Imouzzer- B.P. 2202 Atlas Fes, Morocco.*

*2Laboratory of Applied Chemistry, Faculty of Sciences and Technology, University Sidi Mohamed Ben Abdellah,Road Imouzzer- B.P. 2202 Atlas Fes, Morocco.*

*3 Department of Industrial Engineering, University of Padova, Via F.Marzolo 9, Padova, Italy.*

*4Department of Geosciences, University of Padova, via Gradenigo 6, 35131, Padova, Italy.*

*5C.N.R. Institute of Geosciences and Earth Resources, via Gradenigo 6, 35131, Padova, Italy.*

*6Department of Management and Engineering, University of Padova, Stradella San Nicola 3, 36100 Vicenza, Italy.*

**Figure SI 1 :** FT-IR spectra of Neat epoxy **(A)**, **EA45%** **(B)** and **EA55% (C)**

**Figure SI 2 :** XRD spectra of clays **A1**, **A3** and **A5** and of the corresponding nanocomposites **EA15% EA55%,**and **EA55%.**

Chl=chlorite, mica=illite and/or muscovite, pyr=pyrophyllite, ka=kaolinite, mix-l=mixed layers
